# Supplementary material for: Shifting dynamics and environmental implications of the irrigation pump market in India
Source: Frontiers journal article supplement (doi:10.3389/fenvs.2024.1398822), 2024-06-21
Supplement: Table_1.XLSX [file Table_1.XLSX]

## Sheet: Sheet1
					Farmer's share
Type of SIPs	Estimated price	Central Govt.	State Govt.	total subsidy	token	total left	Total farmer share	% subsidy	% farmer owns
2 hp DC surface	144520	43358	43358	86716	5000	52810	57810	60.0028	40.0014
2 hp AC surface	144526	43358	43358	86716	5000	52010	57010	60.0003	39.4462
2 hp DC summersible	147131	44139	44139	88278	5000	53853	58853	59.9996	40.0004
2 hp AC summersible	147927	44378	44378	88756	5000	54171	59171	59.9999	40.0001
3 hp DC summersible	194516	58355	58355	116710	5000	72806	77806	60.0002	39.9998
3 hp AC summersible	193460	58038	58038	116076	5000	72384	77384	60	40
5 hp AC summersible	273137	81941	81941	163882	5000	104255	109255	59.9999	40.0001
7.5 hp AC summersible	372126	111638	111638	223276	5000	143050	148050	60.0001	39.7849
10 hp AC summersible	464304	111638	111638	223276	5000	236020	241020	48.0883	51.91
